# Supplementary material for: Trends and Variation in Data Quality on the EU Clinical Trials Register: A Cross-Sectional Study
Source: bioRxiv or medRxiv preprint supplement (doi:10.1101/2021.06.29.21259627), 2021-07-03

## Supplementary Information: DeVito & Goldacre

### Supplemental Figure 1

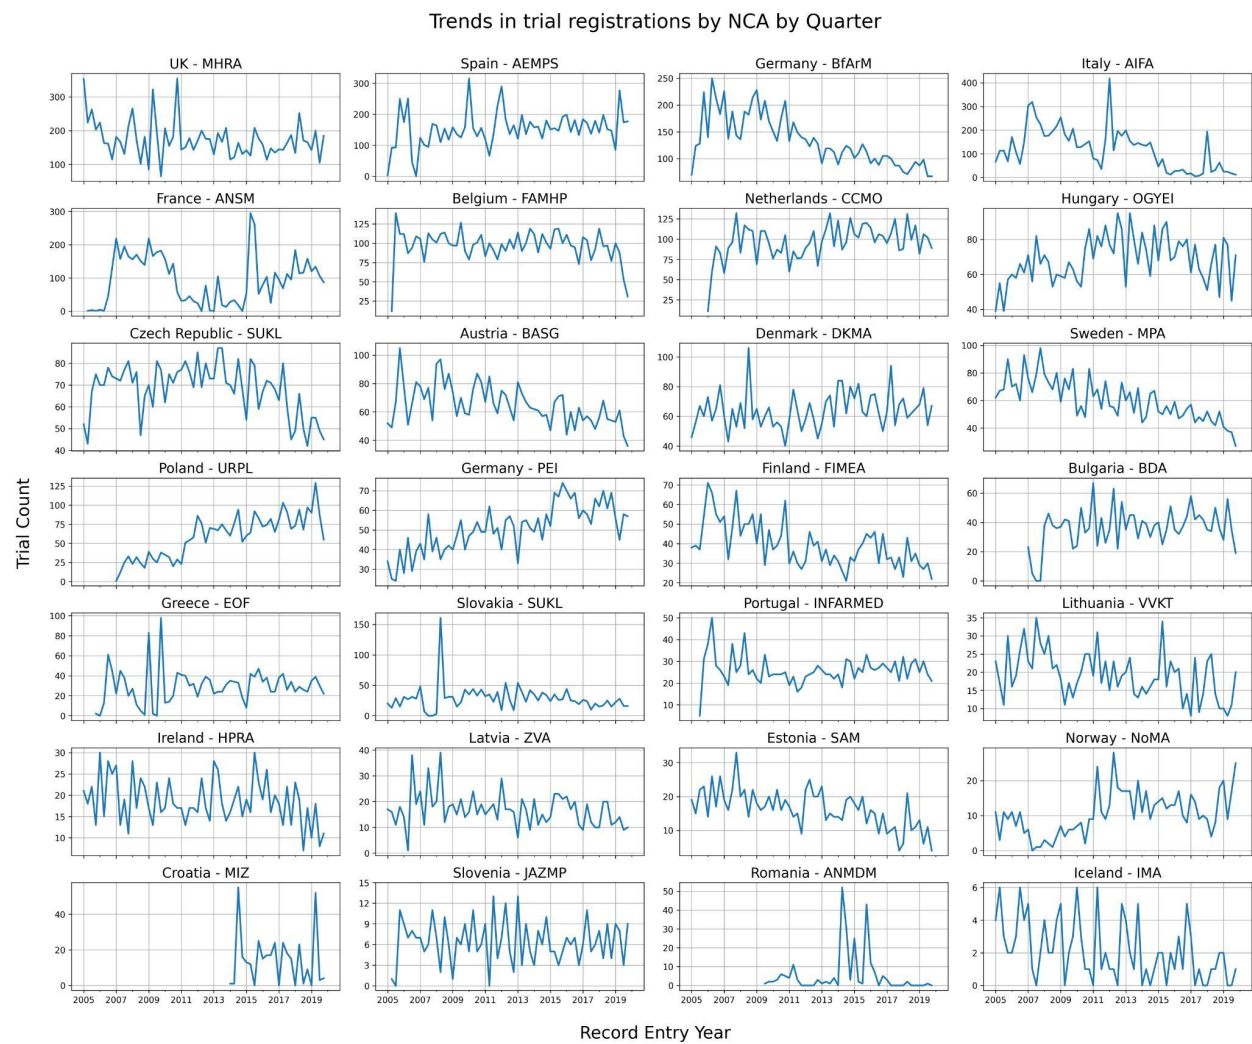

Supplemental Figure 2

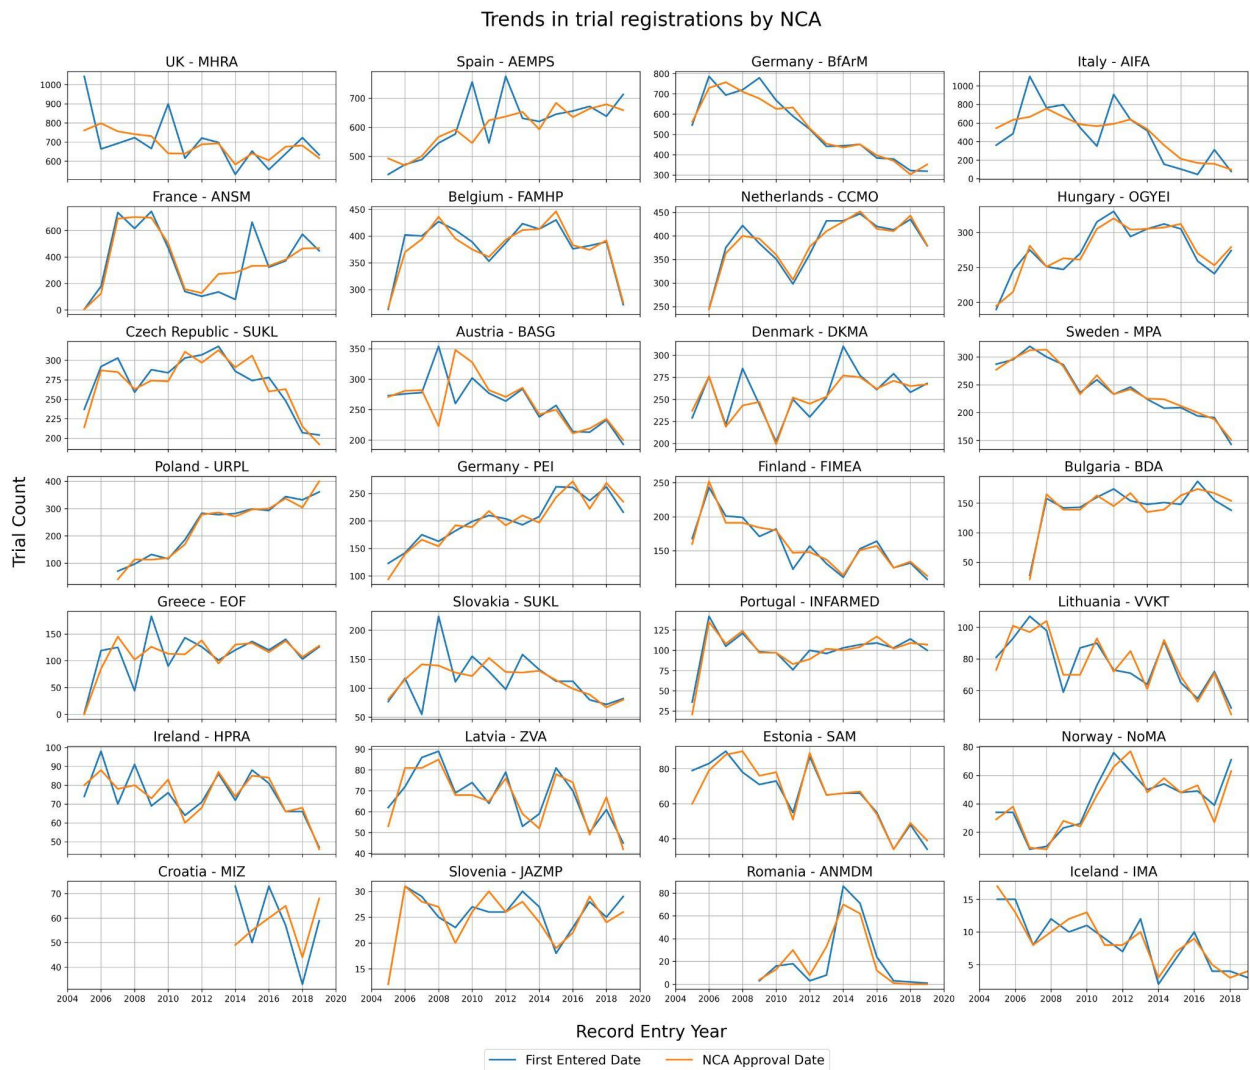

Supplemental Figure 3

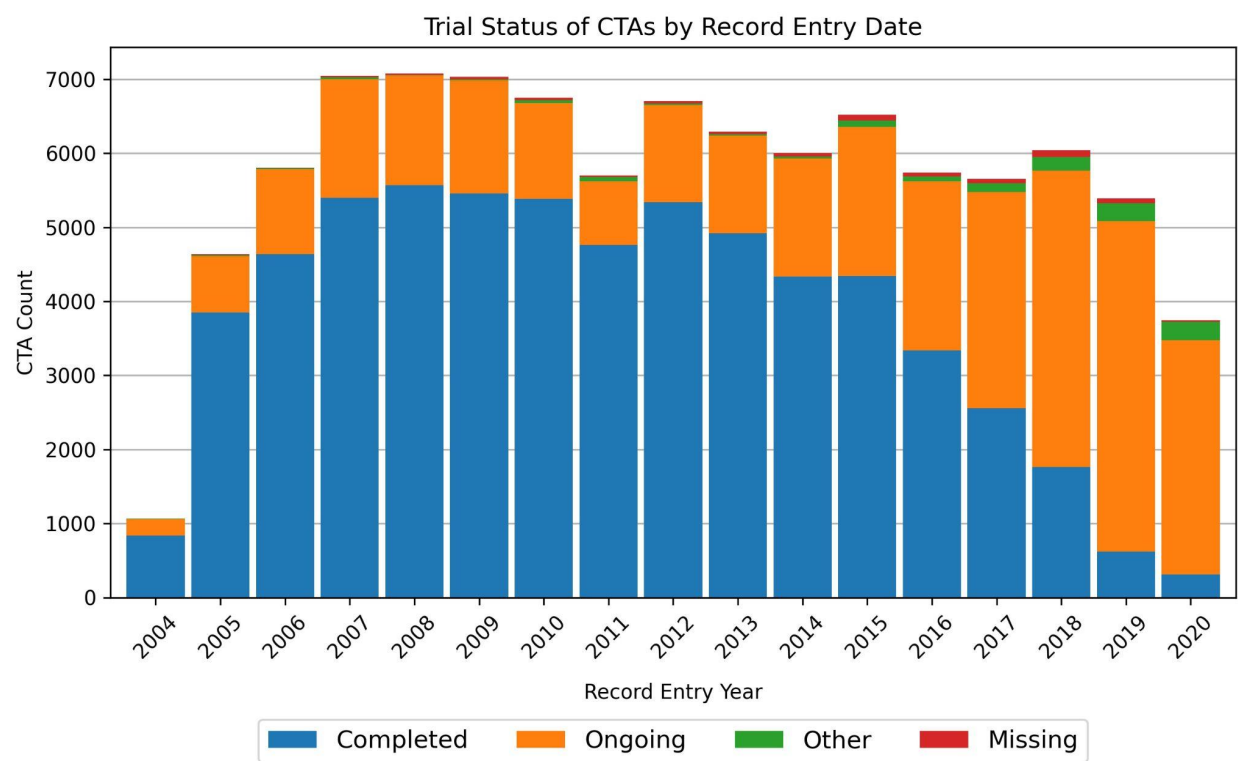

Supplemental Figure 4

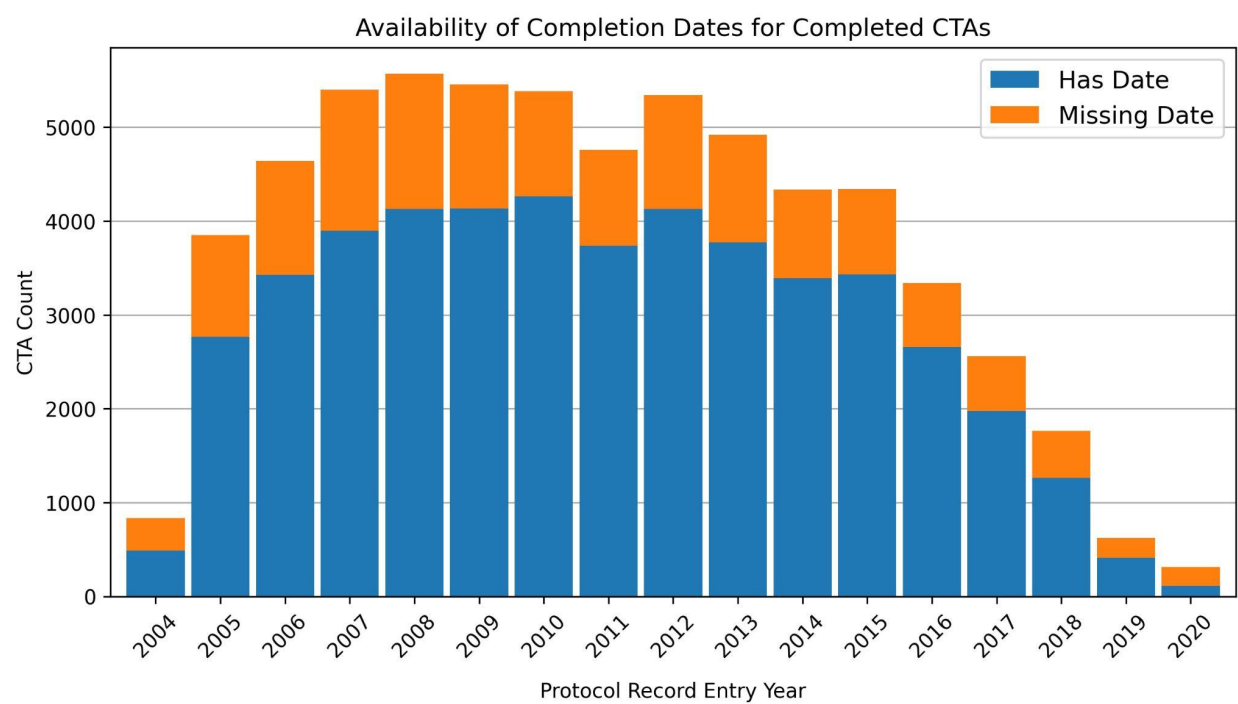

Supplement: Supplementary file [file media-2.pdf]
